# Supplementary material
Source: HighWire-hosted journal article supplement (http://rc.rcjournal.com/highwire/filestream/11933/field_highwire_adjunct_files/0/RC-02065.R2_Horita_Suppl.pdf)
Supplement: RC-02065.R2_Horita_Suppl.pdf [file RC-02065.R2_Horita_Suppl.pdf]

# Short-Form Geriatric Depression Scale

- |                                                                           |     |           |
|---------------------------------------------------------------------------|-----|-----------|
| 1. Are you basically satisfied with your life?                            | yes | <b>no</b> |
| 2. Have you dropped many of your activities and interests?                | yes | no        |
| 3. Do you feel that your life is empty?                                   | yes | no        |
| 4. Do you often get bored?                                                | yes | no        |
| 5. Are you in good spirits most of the time?                              | yes | <b>no</b> |
| 6. Are you afraid that something bad is going to happen to you?           | yes | no        |
| 7. Do you feel happy most of the time?                                    | yes | <b>no</b> |
| 8. Do you often feel helpless?                                            | yes | no        |
| 9. Do you prefer to stay at home, rather than going out and doing things? | yes | no        |
| 10. Do you feel that you have more problems with memory than most?        | yes | no        |
| 11. Do you think it is wonderful to be alive now?                         | yes | <b>no</b> |
| 12. Do you feel worthless the way you are now?                            | yes | no        |
| 13. Do you feel full of energy?                                           | yes | <b>no</b> |
| 14. Do you feel that your situation is hopeless?                          | yes | no        |
| 15. Do you think that most people are better off than you are?            | yes | no        |
